# Supplementary material for: A Novel Strategy of Combined Pulsed Electro-Oxidation and Electrolysis for Degradation of Sulfadiazine
Source: MDPI journal article supplement (doi:10.3390/molecules28083620), 2023-04-21
Supplement: s1 [file s1]

SUPPORTING INFORMATION

# A Novel Strategy of Combined Pulsed Electro-oxidation and Electrolysis for Degradation of Sulfadiazine

*Dong Ma<sup>#</sup>, Bo Zhang<sup>#</sup>, Xiaomin Hu<sup>\*</sup>*

Department of Environmental Engineering, School of Resource & Civil Engineering,

Northeastern University, Shenyang 110819, China

Phone & Fax: +86-24-83680401

Email: hxmin\_jj@163.com

**<sup>#</sup>These authors contributed equally to this study.**

**\*Corresponding Author:**

Xiaomin Hu, Northeastern University, Email: hxmin\_jj@163.com, Phone & Fax: +86-24-83680401

## Table of Contents

**Text S1.** Response surface methodology (RSM) analysis

**Text S2.** EPR instrumental parameters.

**Text S3.** Analytical methods of byproducts.

**Table S1.** First order kinetics of SND degradation with different PMS concentration

**Table S2.** First order kinetics of SND degradation with different frequency

**Table S3.** First order kinetics of SND degradation with different pH

**Table S4.** First order kinetics of SND degradation with different electrode inter distance

**Table S5.** First order kinetics of SND degradation with different impulse voltage

**Table S6.** First order kinetics of SND degradation with different duty cycle

**Table S7.** First-order kinetics of SND degradation with different reaction systems

**Table S8.** Variance analysis for the established regression model

**Table S9.** Reaction rate of radical inhibitors with hydroxyl and sulfate radicals

**Table S10.** Chemical and physical character of SND.

**Table S11** Contribution rate of active species oxidized substance degradation by PMS activated by different electric fields.

**Figure S1.** Diagram of experimental device.

**Figure S2.** Effect of  $\text{NO}_3^-$  concentration on SND degradation.

**Figure S3.** Effect of  $\text{Cl}^-$  concentration on SND degradation.

**Figure S4.** ESR spectra at three reaction systems.

**Figure S5.** Effect of operation parameters on degradation rate of SND. (a) Initial PMS concentration; (b) Voltage of PEF; (c) Frequency of PEF; (d) Duty cycle of PEF; (e) Initial pH value; (f) Electrode inter distanceReferences.

**Test S1.** Response surface methodology (RSM) analysis

According to the Box-Benhnken design prinSNDle, the response surface test results were fitted to the second-order model data, and the regression equation was obtained as follows:

$$\text{SND degradation rate} = 70.07 + 8.20A + 3.41B - 2.64C - 0.81AB + 0.26AC + 4.04BC - 14.28A^2 - 6.31B^2 - 5.21C^2$$

**Test S2.** EPR instrumental parameters

The center field of the spectrometer was 3897 G, resonance frequency (empty) of 9.81 GHz. The signal of free radicals that were trapped by 5,5-dimethyl-pyrroline-oxide (DMPO). The sample solution and 50  $\mu$ M DMPO solution were mixed quickly at a ratio of 2:1 (v/v) to get adducts. Operating parameters: Center field, 3385 G; Static field, 3285 G; sweep width, 200 G; Modulation frequency, 100 kHz; Modulation amplitude, 2.00 G; Microwave bridge frequency, 9.52 GHz; Power, 2.00 mW. Four equidistance and highly intense peaks with intensity ratio of approximately 1:2:2:1 and six low intensity peaks whose ratio was approximately 1:1:1:1:1:1 as signed to DMPO–OH and DMPO–OSO<sub>3</sub>H, respectively. The hyperfine splitting constants for the modeled spectra were as follows:  $a_H = a_N = 14.9$  G for DMPO–OH;  $a_N = 12.2$  G,  $a_H = 10.28$  G, 2.58 G and 0.1 G for DMPO–OSO<sub>3</sub>H.

**Test S3.** Analytical methods of byproducts.

For characterization of SND degradation by HPLC-MC/MS (Agilent Technologies, USA), the Column - C18 ( $2.1 \times 100$  mm,  $1.7 \mu\text{m}$ ) was used. The mass spectrometric analysis was conducted using positive/ negative electrospray ionization with a mass scan range of  $m/z$  50-1000. The capillary voltage, cone voltage, desolvation temperature, and source temperature were set at 2000 V, 40 V,  $450^\circ\text{C}$ , and  $115^\circ\text{C}$ , respectively.

10  $\mu\text{L}$  of the samples was injected into column with the mobile phases of 10mM ammonium acetate/methanol (10/90, v/v). The flow rate was set at  $0.2 \text{ mL min}^{-1}$  and the column temperature maintained at  $30^\circ\text{C}$ , operated with electro spray ionization (ESI) in negative mode.

## Tables

Table S1 First order kinetics of SND degradation with different PMS concentration

| PMS (g/L) | k/min <sup>-1</sup>   | R <sup>2</sup> |
|-----------|-----------------------|----------------|
| 0.05      | 2.2×10 <sup>-3</sup>  | 0.8414         |
| 0.1       | 6.02×10 <sup>-3</sup> | 0.9933         |
| 0.3       | 6.35×10 <sup>-3</sup> | 0.9761         |
| 0.5       | 8.01×10 <sup>-3</sup> | 0.9775         |
| 1         | 8.25×10 <sup>-3</sup> | 0.9589         |

Table S2 First order kinetics of SND degradation with different frequency

| Frequency (Hz) | k/min <sup>-1</sup>   | R <sup>2</sup> |
|----------------|-----------------------|----------------|
| 500            | 4.74×10 <sup>-3</sup> | 0.9744         |
| 1000           | 1×10 <sup>-2</sup>    | 0.9881         |
| 3000           | 1.04×10 <sup>-2</sup> | 0.9958         |
| 5000           | 9.73×10 <sup>-3</sup> | 0.9941         |
| 20000          | 6.45×10 <sup>-3</sup> | 0.9782         |

Table S3 First order kinetics of SND degradation with different pH

| pH | k/min <sup>-1</sup>   | R <sup>2</sup> |
|----|-----------------------|----------------|
| 1  | 1.45×10 <sup>-2</sup> | 0.9906         |
| 3  | 1.04×10 <sup>-2</sup> | 0.9958         |
| 5  | 5.9×10 <sup>-3</sup>  | 0.9965         |
| 7  | 5.13×10 <sup>-3</sup> | 0.9801         |
| 9  | 3.54×10 <sup>-3</sup> | 0.9497         |



Table S4 First order kinetics of SND degradation with different electrode inter distance

| Electrode inter distance (cm) | k/min <sup>-1</sup>   | R <sup>2</sup> |
|-------------------------------|-----------------------|----------------|
| 2.1                           | 3.79×10 <sup>-3</sup> | 0.9772         |
| 2.8                           | 7.67×10 <sup>-3</sup> | 0.9984         |
| 3.5                           | 1.04×10 <sup>-2</sup> | 0.9958         |
| 4.2                           | 8.71×10 <sup>-3</sup> | 0.9929         |
| 4.9                           | 9.49×10 <sup>-3</sup> | 0.9942         |

Table S5 First order kinetics of SND degradation with different voltage

| Voltage (V) | k/min <sup>-1</sup>   | R <sup>2</sup> |
|-------------|-----------------------|----------------|
| 4           | 5.36×10 <sup>-3</sup> | 0.9929         |
| 5           | 8.01×10 <sup>-3</sup> | 0.9775         |
| 6           | 8.3×10 <sup>-3</sup>  | 0.9704         |
| 7           | 1×10 <sup>-2</sup>    | 0.9877         |
| 8           | 1.06×10 <sup>-2</sup> | 0.9848         |

Table S6 First order kinetics of SND degradation with different duty cycle

| Duty cycle (%) | k/min <sup>-1</sup>   | R <sup>2</sup> |
|----------------|-----------------------|----------------|
| 10             | 5.14×10 <sup>-3</sup> | 0.9536         |
| 30             | 9.52×10 <sup>-3</sup> | 0.9994         |
| 50             | 1×10 <sup>-2</sup>    | 0.9877         |
| 70             | 9.85×10 <sup>-3</sup> | 0.9693         |
| 90             | 1.02×10 <sup>-2</sup> | 0.9523         |

Table S7 First-order kinetics of SND degradation with different reaction systems

| Reaction systems | k/min <sup>-1</sup>   | R <sup>2</sup> |
|------------------|-----------------------|----------------|
| PMS alone        | 2.72×10 <sup>-3</sup> | 0.9624         |
| Direct alone     | 6.17×10 <sup>-3</sup> | 0.9724         |
| Direct+PMS       | 6.6×10 <sup>-3</sup>  | 0.9763         |
| Pulse alone      | 6.97×10 <sup>-3</sup> | 0.9725         |
| Pulse+PMS        | 1.04×10 <sup>-2</sup> | 0.9958         |

Table S8 Variance analysis for the established regression model

| Sources of variation           | Quadratic sum | Degree of freedom | Mean square | F       | P       | Clinical significance |
|--------------------------------|---------------|-------------------|-------------|---------|---------|-----------------------|
| Model                          | 1995.20       | 9                 | 221.69      | 381.89  | <0.0001 | **                    |
| A                              | 537.59        | 1                 | 537.59      | 926.08  | <0.0001 | **                    |
| B                              | 92.75         | 1                 | 92.75       | 159.78  | <0.0001 | **                    |
| C                              | 55.76         | 1                 | 55.76       | 96.05   | <0.0001 | **                    |
| AB                             | 2.59          | 1                 | 2.59        | 4.47    | 0.0725  |                       |
| AC                             | 0.26          | 1                 | 0.26        | 0.45    | 0.5247  |                       |
| BC                             | 65.45         | 1                 | 65.45       | 112.74  | <0.0001 | **                    |
| A <sup>2</sup>                 | 859.08        | 1                 | 859.08      | 1479.89 | <0.0001 | **                    |
| B <sup>2</sup>                 | 167.59        | 1                 | 167.59      | 288.70  | <0.0001 | **                    |
| C <sup>2</sup>                 | 114.47        | 1                 | 114.47      | 197.18  | <0.0001 | **                    |
| Residual error                 | 4.06          | 7                 | 0.58        |         |         |                       |
| Lack of fit                    | 1.90          | 3                 | 0.63        | 1.17    | 0.4255  |                       |
| Pure error                     | 2.17          | 4                 | 0.54        |         |         |                       |
| Total variation                | 1999.26       | 16                |             |         |         |                       |
| R <sup>2</sup>                 |               |                   |             |         | 0.9980  |                       |
| R <sup>2</sup> <sub>Adj</sub>  |               |                   |             |         | 0.9954  |                       |
| R <sup>2</sup> <sub>Pred</sub> |               |                   |             |         | 0.9831  |                       |

\*\*P≤0.01 means factors have a significant impact on the response value.

Table S9 Reaction rate of radical inhibitors with hydroxyl and sulfate radicals

| Radical inhibitors | Rate constants/ ( $\text{mol}\cdot\text{L}^{-1}\cdot\text{s}^{-1}$ ) |                            |
|--------------------|----------------------------------------------------------------------|----------------------------|
|                    | $\cdot\text{OH}$                                                     | $\text{SO}_4\cdot^-$       |
| SND                | $8.78\times 10^9$                                                    | $4.16\times 10^{10}$       |
| MeOH               | $9.7\times 10^8$                                                     | $3.2\times 10^6$           |
| Ethanol            | $(1.2\sim 2.8)\times 10^9$                                           | $(1.6\sim 7.7)\times 10^7$ |
| TBA                | $(3.8\sim 7.6)\times 10^9$                                           | $(4\sim 9.1)\times 10^5$   |
| Nitrobenzene       | $(3\sim 3.9)\times 10^9$                                             | $1.2\times 10^5$           |

Table S10 Chemical and physical character of SND.

| Characters         | Value                                                                                                                            |
|--------------------|----------------------------------------------------------------------------------------------------------------------------------|
| Molecule structure | 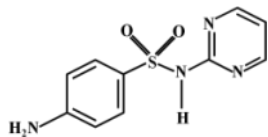<br><chem>Nc1ccc(cc1)S(=O)(=O)Nc2ccncc2</chem> |
|                    | C <sub>10</sub> H <sub>10</sub> N <sub>4</sub> O <sub>2</sub> S                                                                  |
| Molar mass         | 250.28                                                                                                                           |
| pK <sub>a1</sub>   | 2.49                                                                                                                             |
| pK <sub>a2</sub>   | 6.48                                                                                                                             |

Table S11 Contribution rate of active species oxidized substance degradation by PMS activated

|         | by different electric fields |                    |
|---------|------------------------------|--------------------|
|         | $\text{SO}_4^{\bullet-}$     | $\bullet\text{OH}$ |
| PEF/PMS | 12                           | 30                 |
| CEF/PMS | 4                            | 10                 |



## Figures

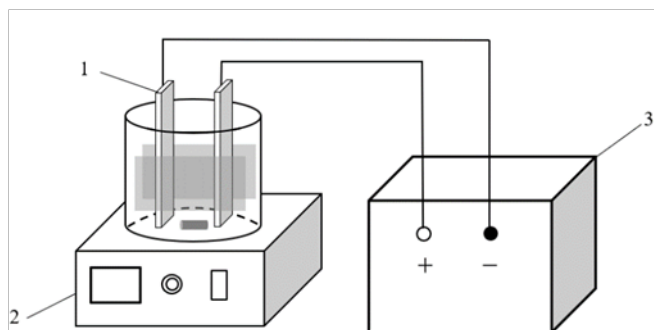

1. Graphite electrode; 2. Magnetic stirring controller; 3. Power supply.

**Figure S1.** Diagram of experimental device.

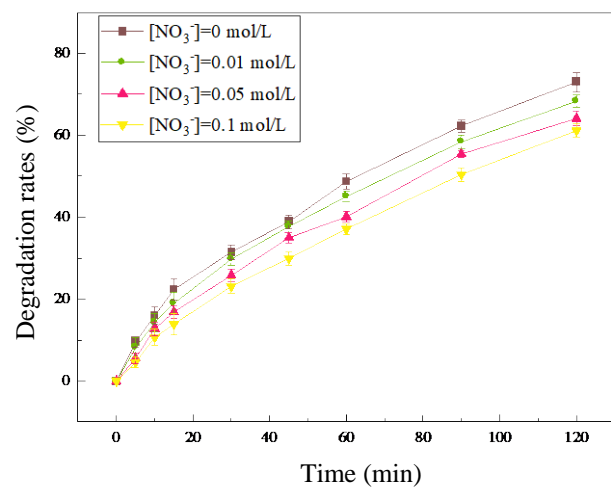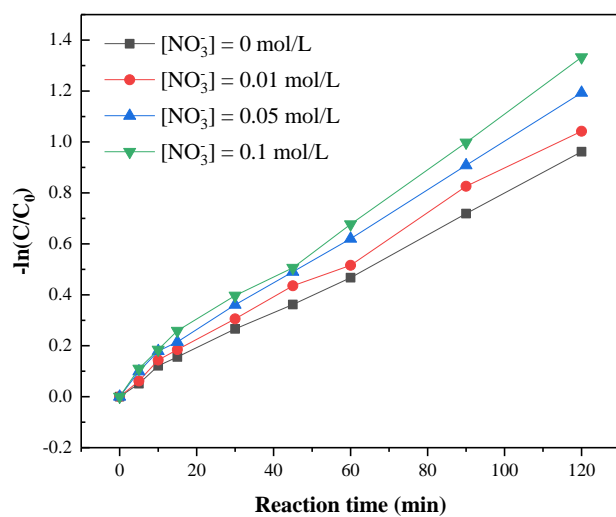

**Figure. S2** Effect of  $\text{NO}_3^-$  concentration on SND degradation

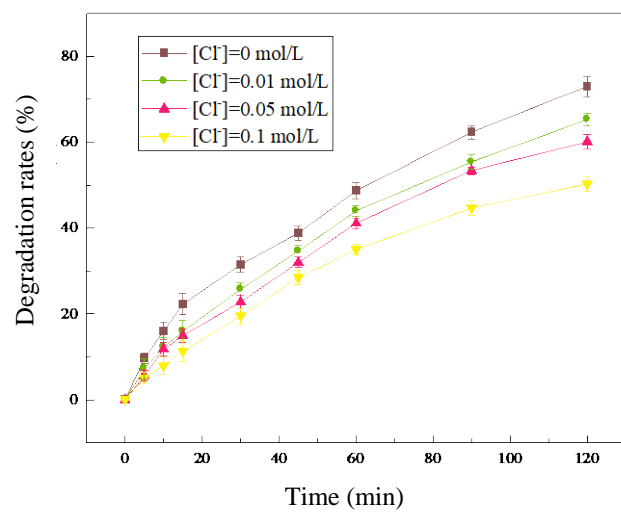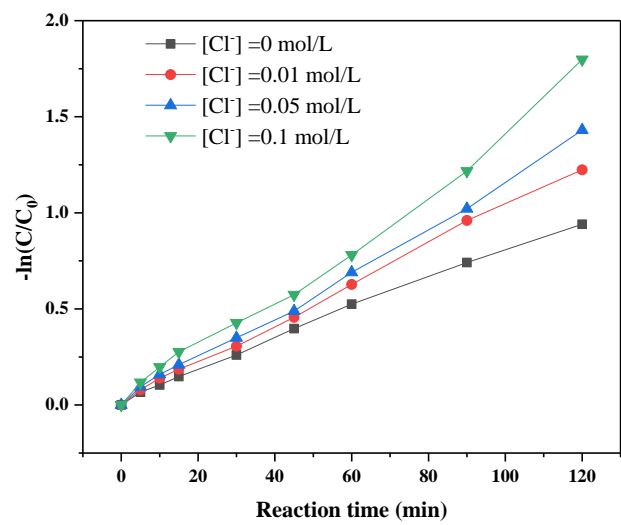

**Figure. S3** Effect of  $\text{Cl}^-$  concentration on SND degradation

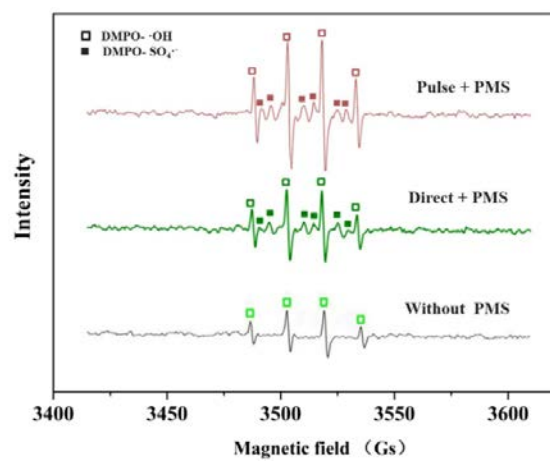

Figure S4. ESR spectra at three reaction systems

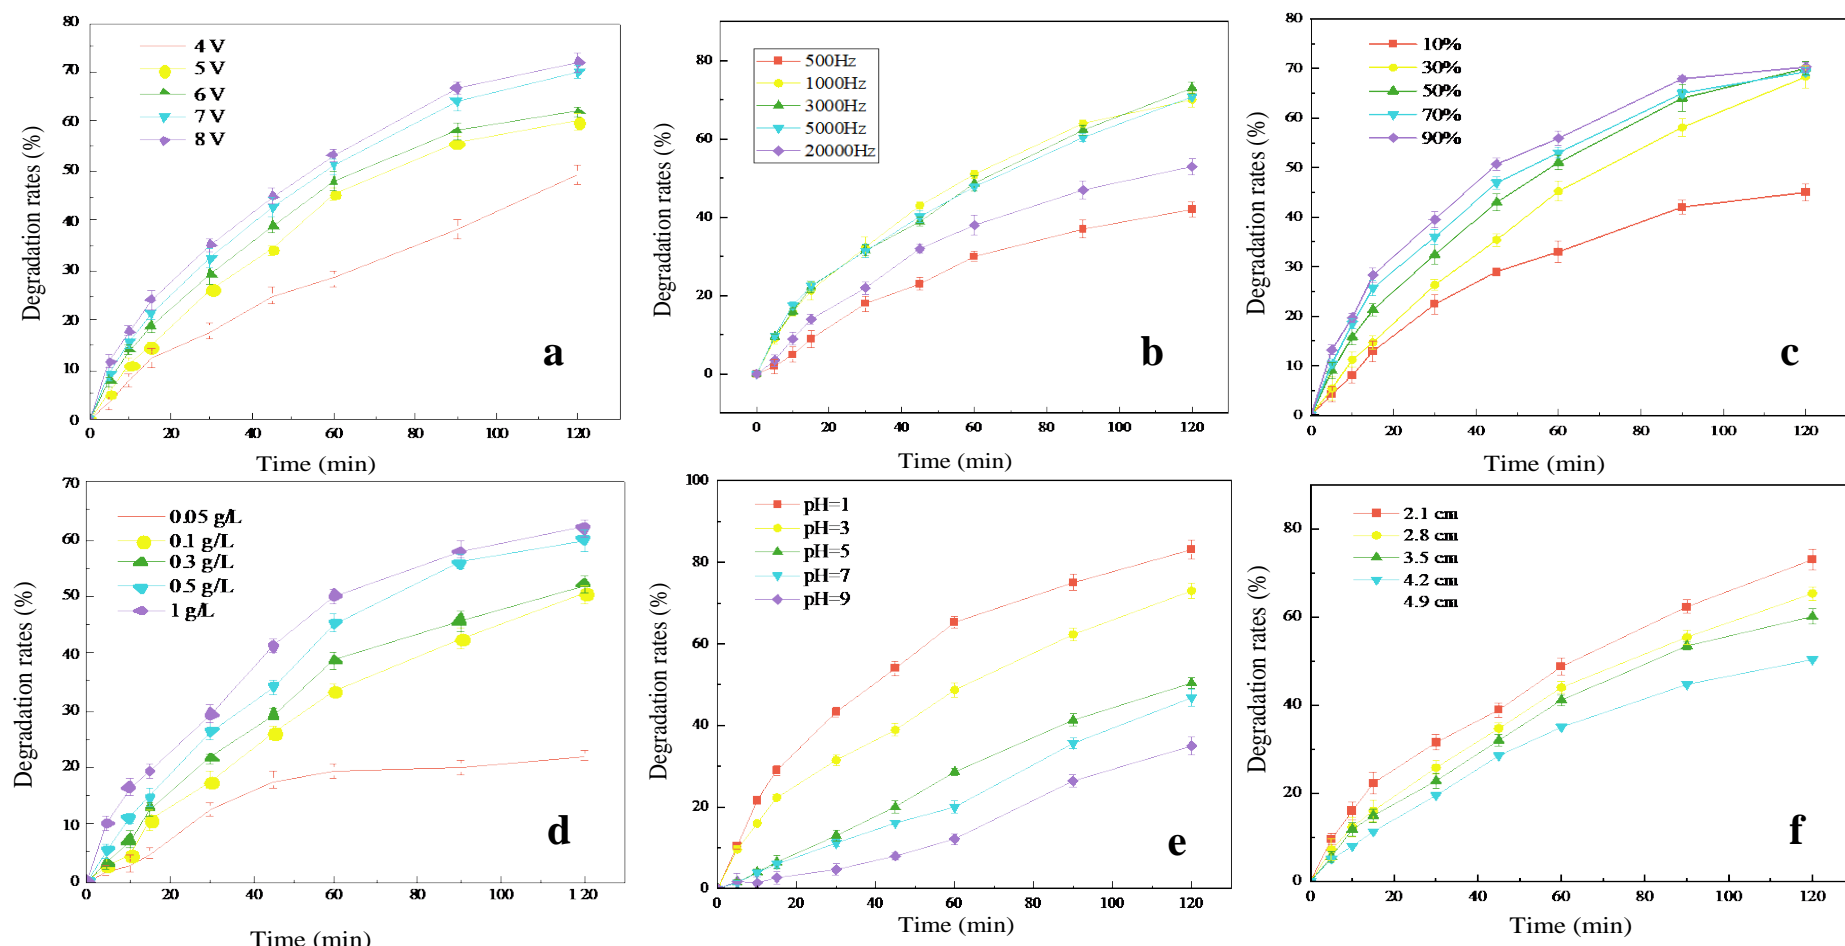

**Figure S5.** Effect of operation parameters on degradation rate of SND. (a) Initial PMS concentration; (b) Voltage of PEF; (c) Frequency of PEF; (d) Duty cycle of PEF; (e) Initial pH value; (f) Electrode inter distance
